# Supplementary material for: Hydrogels of engineered bacterial fimbriae can finely tune 2D human cell culture
Source: Royal Society of Chemistry journal article supplement (doi:10.1039/d0bm01966f), 2021-01-01
Supplement: d0bm01966f1.pdf [file d0bm01966f1.pdf]

# Hydrogels of engineered bacterial fimbriae can finely tune 2D human cell culture

Gema Dura; Maria Crespo-Cuadrado; Helen Waller; Daniel T. Peters; Ana Marina Ferreira; Jeremy H. Lakey; David A. Fulton.

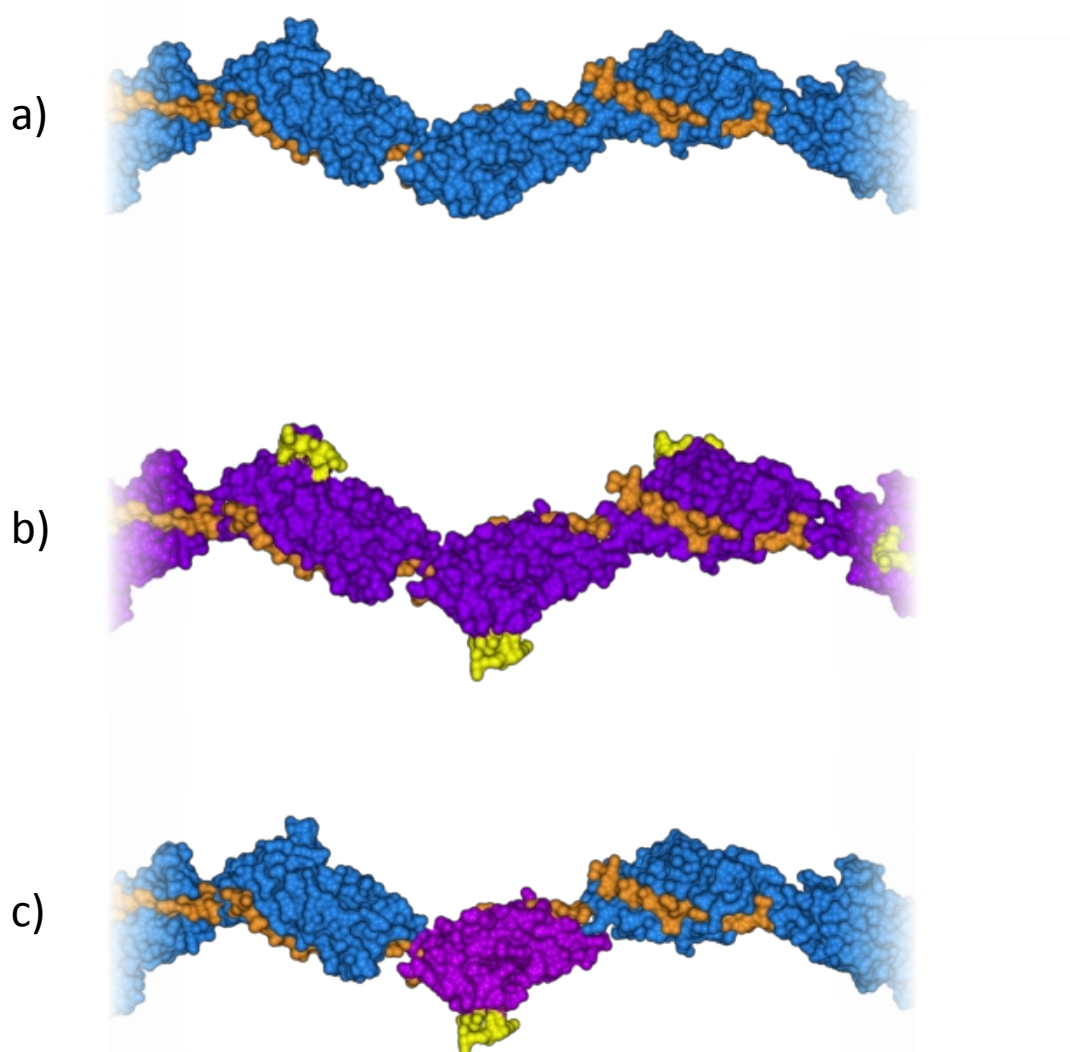

**Figure S1:** a) Structural model of a *native-Caf1*<sup>WT</sup> polymer. Individual subunits are shown as a blue molecular surface with the N-terminal donor strand highlighted in orange. b) Structural model of *native-Caf1*<sup>RGDS</sup> polymer, produced by RosettaRemodel<sup>24</sup> using the *Caf1*<sup>WT</sup> structure as the input. The polymer is shown as a purple molecular surface, with the N-terminal donor strand highlighted in orange and the RGDS insertion highlighted in yellow. c) Structural model of *refolded-Caf1*<sup>WT-RGDS</sup> obtained after thermal refolding.

a)

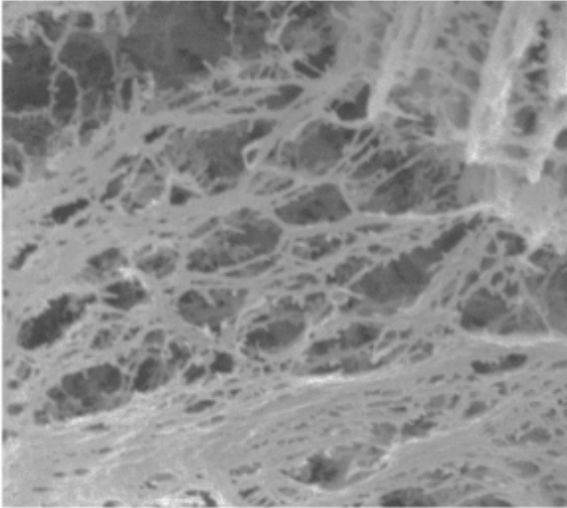

b)

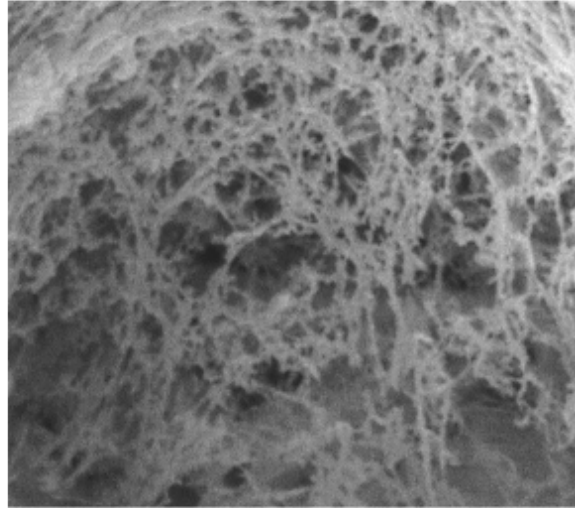

2  $\mu$ m

**Figure S2.** SEM images of the dried samples of hydrogels obtained from a) 2.5% *native*-Caf1<sup>WT</sup>, and b) 2.5% *refolded*-Caf1<sup>WT</sup> hydrogel. In both cases the samples displayed interconnected porous networks.
